# Supplementary material for: Oral Delivery of Nucleic Acids with Passive and Active Targeting to the Intestinal Tissue Using Polymer-Based Nanocarriers
Source: MDPI journal article supplement (doi:10.3390/pharmaceutics13071075), 2021-07-13
Supplement: s1 [file s1]

# Supplementary Materials: Oral Delivery of Nucleic Acids with Passive and Active Targeting to the Intestinal Tissue Using Polymer-Based Nanocarriers

Sagun Poudel, Prabhat R. Napit, Karen P. Briski and George Mattheolabakis

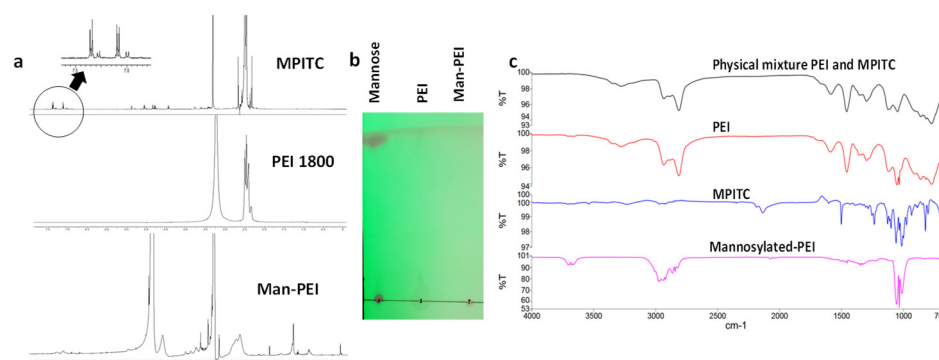

**Figure S1.** Characterization of Man-PEI. (a) NMR spectrum of PEI, MPITC and PEI-Mannose; (b) FT-IR of PEI-Mannose and its components and their physical mixture; (c) TLC of Mannose, PEI-1800 and the PEI-Mannose product.

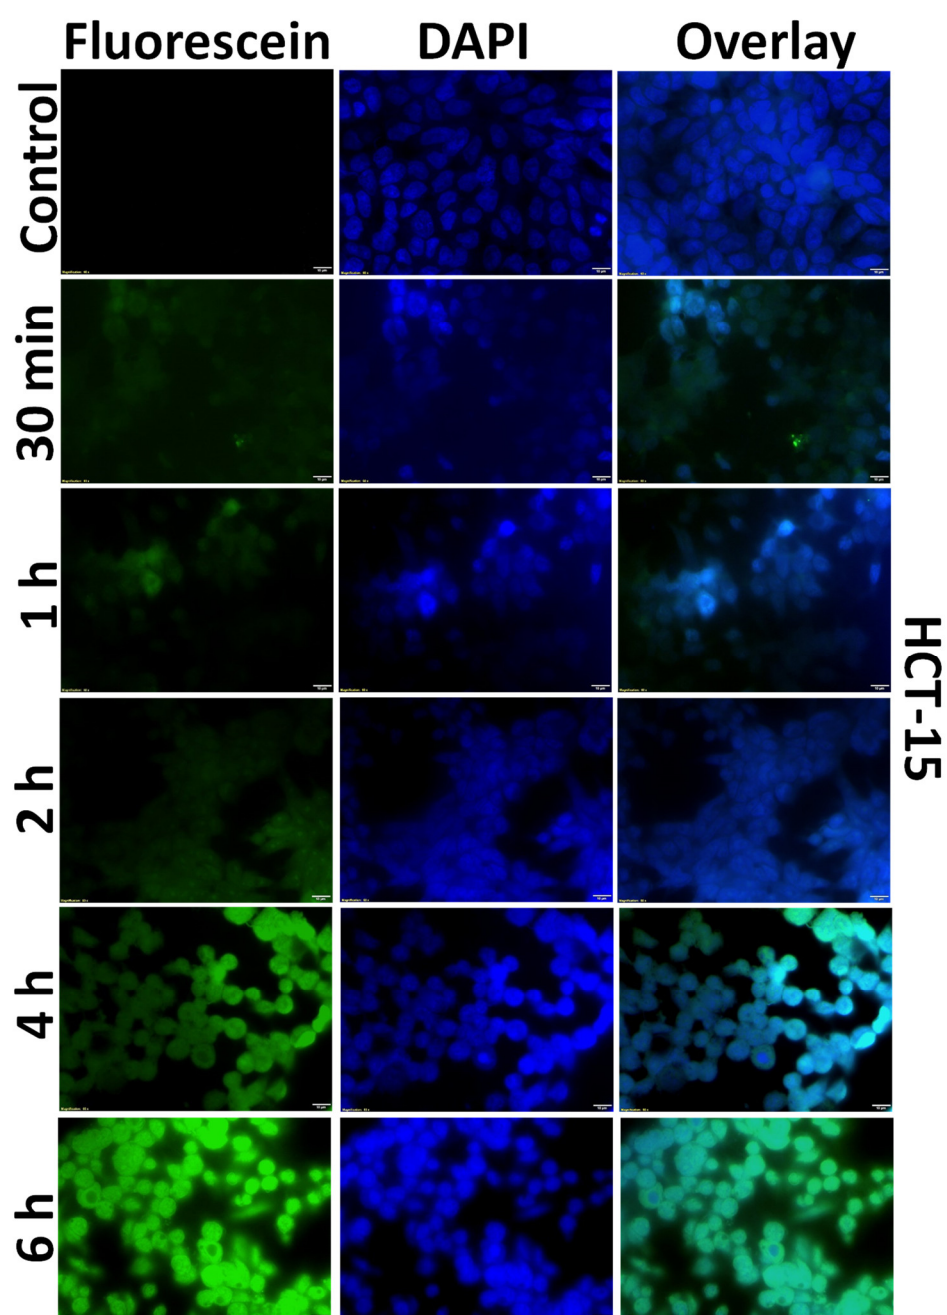

**Figure S2.** Cellular uptake of Fluorescein-labeled Man-PEI/plasmid complexes by HCT-15 cells. Incubation of pGL-3 with fluorescently labeled Man-PEI complexes with HCT-15 cells indicated a time-dependent increase in the cellular uptake, as observed by fluorescent microscopy.
